# Supplementary material for: Topiramate in the Treatment of Generalized Convulsive Status Epilepticus in Adults: A Systematic Review with Individual Patient Data Analysis
Source: Springer Nature journal article supplement (doi:10.1007/s40265-016-0672-2), 2016-12-21
Supplement: MOESM1 [file 24120916]

**Article title:** Topiramate in the treatment of generalized convulsive status epilepticus in adults: a systematic review with individual patient data analysis.

**Journal name:** Drugs.

**Authors:** Francesco Brigo, Nicola Luigi Bragazzi, Stanley C. Igwe, Raffaele Nardone, Eugen Trinkka

**Corresponding author:** Francesco Brigo, Department of Neuroscience, Biomedicine and Movement. University of Verona, Italy. Piazzale L.A. Scuro, 10 - 37134 Verona, Italy. Tel.: +390458124174; fax +390458124873 E-mail: dr.francescobrigo@gmail.com

## Articles excluded and reasons for exclusion

| Article/Study                                                                                                                                                                                           | Number of patients treated with topiramate                               | Reason(s) for exclusion                                                             |
|---------------------------------------------------------------------------------------------------------------------------------------------------------------------------------------------------------|--------------------------------------------------------------------------|-------------------------------------------------------------------------------------|
| Madžar D, Kuramatsu JB, Gerner ST, Huttner HB. Assessing the value of topiramate in refractory status epilepticus. <i>Seizure</i> . 2016 May;38:7-10                                                    | Not reported (17 episodes of status epilepticus treated with topiramate) | No individual patient data were reported                                            |
| Towne AR, Garnett LK, Waterhouse EJ, Morton LD, DeLorenzo RJ. The use of topiramate in refractory status epilepticus. <i>Neurology</i> . 2003 Jan 28;60(2):332-4.                                       | 6                                                                        | Case series with risk of selective outcome reporting bias                           |
| Perry MS, Holt PJ, Sladky JT. Topiramate loading for refractory status epilepticus in children. <i>Epilepsia</i> . 2006 Jun;47(6):1070-1.                                                               | 3                                                                        | Study conducted in children                                                         |
| Bensalem MK, Fakhoury TA. Topiramate and status epilepticus: report of three cases. <i>Epilepsy Behav</i> . 2003 Dec;4(6):757-60.                                                                       | 3                                                                        | Case series with risk of selective outcome reporting bias                           |
| Perucca E. What is the promise of new antiepileptic drugs in status epilepticus? Focus on brivaracetam, carisbamate, lacosamide, NS-1209, and topiramate. <i>Epilepsia</i> . 2009 Dec;50 Suppl 12:49-50 | -                                                                        | Review. No individual patient data were reported                                    |
| Selvitelli M, Drislane FW. Recent developments in the diagnosis and treatment of status epilepticus. <i>Curr Neurol Neurosci Rep</i> . 2007 Nov;7(6):529-35                                             | -                                                                        | Review. No individual patient data were reported                                    |
| Soler B, Godoy J, Mellado Talesnik P. [Treatment of refractory status epilepticus with topiramate.                                                                                                      | 3                                                                        | Case series conducted in children and with risk of selective outcome reporting bias |

|                                                                                                                                                                                                                                         |    |                                                                                                                         |
|-----------------------------------------------------------------------------------------------------------------------------------------------------------------------------------------------------------------------------------------|----|-------------------------------------------------------------------------------------------------------------------------|
| Report of three cases]. Rev Med Chil. 2009 Jul;137(7):936-9.                                                                                                                                                                            |    |                                                                                                                         |
| Blumkin L, Lerman-Sagie T, Hourri T, Gilad E, Nissenkorn A, Ginsberg M, Watemberg N. Pediatric refractory partial status epilepticus responsive to topiramate. J Child Neurol. 2005 Mar;20(3):239-41.                                   | 2  | Case series conducted in children and with risk of selective outcome reporting bias; data on partial status epilepticus |
| Reuber M, Evans J, Bamford JM. Topiramate in drug-resistant complex partial status epilepticus. Eur J Neurol. 2002 Jan;9(1):111-2                                                                                                       | 1  | Case report with risk of selective outcome reporting bias; data on partial status epilepticus                           |
| Bragatti JA, Torres CM, Netto CB, Vedolin L, Garzon E, Rieder CR, Schwartz IV, Bianchin MM. opiramate is effective for status epilepticus and seizure control in neuraminidase deficiency. Arq Neuropsiquiatr. 2011 Jun;69(3):565-6.    | 1  | Case report with risk of selective outcome reporting bias                                                               |
| Synowiec AS, Yandora KA, Yenugadhathi V, Valeriano JP, Schramke CJ, Kelly KM. The efficacy of topiramate in adult refractory status epilepticus: experience of a tertiary care center. Epilepsy Res. 2012 Feb;98(2-3):232-7.            | 35 | No individual patient data on SE type were reported                                                                     |
| Shelton CM, Alford EL, Storgion S, Wheless J, Phelps SJ. Enteral topiramate in a pediatric patient with refractory status epilepticus: a case report and review of the literature. J Pediatr Pharmacol Ther. 2014 Oct-Dec;19(4):317-24. | 1  | Pediatric case report with risk of selective outcome reporting bias                                                     |
| Akyildiz BN, Kumandaş S. Treatment of pediatric refractory status epilepticus with topiramate. Childs Nerv Syst. 2011 Sep;27(9):1425-30.                                                                                                | 14 | Pediatric study                                                                                                         |
| Kahrman M, Minecan D, Kutluay E, Selwa L, Beydoun A. Efficacy of topiramate in children with refractory status epilepticus. Epilepsia. 2003 Oct;44(10):1353-6.                                                                          | 3  | Case series conducted in children                                                                                       |
| Kramer U, Sagi L, Goldberg-Stern H, Zelnik N, Nissenkorn A, Ben-Zeev B. Clinical spectrum and medical treatment of children with electrical status epilepticus in sleep (ESES). Epilepsia. 2009 Jun;50(6):1517-24.                      | 14 | Pediatric study; no data on generalized tonic clonic status epilepticus                                                 |
