# Supplementary material for: Topiramate in the Treatment of Generalized Convulsive Status Epilepticus in Adults: A Systematic Review with Individual Patient Data Analysis
Source: Springer Nature journal article supplement (doi:10.1007/s40265-016-0672-2), 2016-12-21
Supplement: MOESM2 [file 24120916]

**Article title:** Topiramate in the treatment of generalized convulsive status epilepticus in adults: a systematic review with individual patient data analysis.

**Journal name:** Drugs.

**Authors:** Francesco Brigo, Nicola Luigi Bragazzi, Stanley C. Igwe, Raffaele Nardone, Eugen Trinka

**Corresponding author:** Francesco Brigo, Department of Neuroscience, Biomedicine and Movement. University of Verona, Italy. Piazzale L.A. Scuro, 10 - 37134 Verona, Italy. Tel.: +390458124174; fax +390458124873 E-mail: dr.francescobrigo@gmail.com

### Individual patient data of patients included in this review

| Patient | Authors     | Study design  | Age | Sex | Weight (kg) | Previous seizures | Type of SE | Etiology | EEG | Consciousness | STESS | EMSE | AEDs at admission | AED prior to TPM | Route | Loading TPM/day | Maintenance TPM/day | Maximum TPM dose/day | SE controlled | Time to TPM | Time from TPM administration to response | Intubation | Outcome     | Time between SE diagnosis and treatment (min) | 1 AED | 2AED | 3 AED | 4AED | 5 AED | 6 AED | 7AED | TPM as last drug |
|---------|-------------|---------------|-----|-----|-------------|-------------------|------------|----------|-----|---------------|-------|------|-------------------|------------------|-------|-----------------|---------------------|----------------------|---------------|-------------|------------------------------------------|------------|-------------|-----------------------------------------------|-------|------|-------|------|-------|-------|------|------------------|
| 1       | Asadi-Pooya | Prospective   | 40  | M   | 60          | N                 | GCSE       | AS       |     |               |       |      | 2                 | NG               | 400   | 200             | 400                 | Y                    |               | <24h        | N                                        | Death      | 2           | DZP                                           | PHT   | TPM  |       |      |       |       | Y    |                  |
| 2       | Asadi-Pooya | Prospective   | 90  | F   | 70          | N                 | GCSE       | AS       |     |               |       |      | 2                 | NG               | 400   | 200             | 400                 | Y                    |               | <24h        | N                                        | Hemiplegia | 2           | DZP                                           | PHT   | TPM  |       |      |       |       | Y    |                  |
| 3       | Asadi-Pooya | Prospective   | 92  | F   | 50          | N                 | GCSE       | AS       |     |               |       |      | 2                 | NG               | 400   | 200             |                     | Y                    |               | <24h        | N                                        | Baseline   | 5           | DZP                                           | PHT   | TPM  |       |      |       |       | Y    |                  |
| 4       | Asadi-Pooya | Prospective   | 37  | F   | 60          | Y                 | GCSE       | E        |     |               |       |      | 2                 | NG               | 400   | 200             | 400                 | Y                    |               | <24h        | N                                        | Baseline   | 15          | DZP                                           | PHT   | TPM  |       |      |       |       | Y    |                  |
| 5       | Asadi-Pooya | Prospective   | 24  | M   | 70          | N                 | GCSE       | RS       |     |               |       |      | 2                 | NG               | 400   | 200             | 400                 | Y                    |               | <24h        | Y                                        | Baseline   | 10          | DZP                                           | PHT   | TPM  | MDL   | PRO  |       |       | N    |                  |
| 6       | Asadi-Pooya | Prospective   | 37  | M   | 60          | N                 | GCSE       | AS       |     |               |       |      | 2                 | NG               | 400   | 200             | 400                 | Y                    |               | <24h        | Y                                        | Baseline   | 10          | DZP                                           | PHT   | TPM  | PB    | MDZ  |       |       | N    |                  |
| 7       | Asadi-Pooya | Prospective   | 70  | M   | 60          | N                 | GCSE       | U        |     |               |       |      | 2                 | NG               | 400   | 200             | 400                 | Y                    |               | <24h        | Y                                        | Death      | 3           | DZP                                           | PHT   | TPM  | PB    |      |       |       | N    |                  |
| 8       | Asadi-Pooya | Prospective   | 73  | M   | 70          | N                 | GCSE       | RS       |     |               |       |      | 2                 | NG               | 400   | 200             | 400                 | Y                    |               | <24h        | N                                        | Baseline   | 10          | DZP                                           | PHT   | TPM  | VPA   |      |       |       | N    |                  |
| 9       | Asadi-Pooya | Prospective   | 18  | M   | 70          | N                 | GCSE       | AS       |     |               |       |      | 2                 | NG               | 400   | 200             | 400                 | Y                    |               | <24h        | Y                                        | Baseline   | 10          | DZP                                           | PHT   | TPM  | PB    |      |       |       | N    |                  |
| 10      | Asadi-Pooya | Prospective   | 32  | M   | 60          | Y                 | GCSE       | E        |     |               |       |      | 2                 | NG               | 400   | 200             | 400                 | Y                    |               | <24h        | Y                                        | Baseline   | 20          | DZP                                           | PHT   | TPM  | MDZ   |      |       |       | N    |                  |
| 11      | Asadi-Pooya | Prospective   | 51  | M   | 60          | N                 | GCSE       | AS       |     |               |       |      | 2                 | NG               | 400   | 200             | 400                 | Y                    |               | <24h        | Y                                        | Baseline   | 2           | DZP                                           | PHT   | TPM  | PRO   |      |       |       | N    |                  |
| 12      | Asadi-Pooya | Prospective   | 24  | M   | 60          | Y                 | GCSE       | E        |     |               |       |      | 2                 | NG               | 400   | 200             | 400                 | Y                    |               | <24h        | Y                                        | Baseline   | 10          | DZP                                           | PHT   | TPM  | PB    | MDZ  |       |       | N    |                  |
| 13      | Asadi-Pooya | Prospective   | 60  | M   | 70          | N                 | GCSE       | AS       |     |               |       |      | 2                 | NG               | 400   | 200             | 400                 | Y                    |               | <24h        | Y                                        | Hemiplegia | 2           | DZP                                           | PHT   | TPM  | VPA   | MDZ  |       |       | N    |                  |
| 14      | Asadi-Pooya | Prospective   | 18  | M   | 80          | Y                 | GCSE       | E        |     |               |       |      | 2                 | NG               | 400   | 200             | 400                 | Y                    |               | <24h        | N                                        | Baseline   | 10          | DZP                                           | PHT   | TPM  | VPA   |      |       |       | N    |                  |
| 15      | Asadi-Pooya | Prospective   | 25  | F   | 80          | N                 | GCSE       | U        |     |               |       |      | 2                 | NG               | 400   | 200             | 400                 | N                    |               |             |                                          | Y          | Death       | 10                                            | DZP   | PHT  | TPM   | VPA  | MDZ   | PRO   |      | N                |
| 16      | Asadi-Pooya | Prospective   | 23  | M   | 60          | N                 | GCSE       | U        |     |               |       |      | 2                 | NG               | 400   | 200             | 400                 | N                    |               |             |                                          | Y          | Death       | 10                                            | DZP   | PHT  | TPM   | PB   | MDZ   | PRO   |      | N                |
| 17      | Asadi-Pooya | Prospective   | 61  | M   | 60          | N                 | GCSE       | AS       |     |               |       |      | 2                 | NG               | 400   | 200             | 400                 | N                    |               |             |                                          | Y          | Death       | 2                                             | DZP   | PHT  | TPM   | PB   | MDZ   |       |      | N                |
| 18      | Asadi-Pooya | Prospective   | 23  | F   | 70          | N                 | GCSE       | AS       |     |               |       |      | 2                 | NG               | 400   | 200             | 400                 | N                    |               |             |                                          | Y          | Death       | 3                                             | DZP   | PHT  | TPM   | MDZ  |       |       |      | N                |
| 19      | Kim         | Retrospective | 61  | M   |             | N                 | GCSE       | AS       |     |               |       |      | 0                 | 1                | NG    | 800             |                     | 800                  | N             |             |                                          |            | Death       |                                               | LZP   | TPM  |       |      |       |       | Y    |                  |
| 20      | Kim         | Retrospective | 48  | M   |             | N                 | GCSE       | AS       |     |               |       |      | 0                 | 2                | NG    | 400             |                     | 400                  | Y             |             |                                          |            | Improvement |                                               | LZP   | PHT  | TPM   |      |       |       |      | Y                |
| 21      | Kim         | Retrospective | 51  | F   |             | N                 | GCSE       | AS       |     |               |       |      | 2                 | 2                | NG    | 800             |                     | 800                  | Y             |             |                                          |            | Death       |                                               | LZP   | PHT  | TPM   |      |       |       |      | Y                |
| 22      | Kim         | Retrospective | 48  | F   |             | N                 | GCSE       | AS       |     |               |       |      | 1                 | 2                | NG    | 800             |                     | 800                  | Y             |             |                                          |            | Death       |                                               | LZP   | PHT  | TPM   |      |       |       |      | Y                |
| 23      | Kim         | Retrospective | 79  | M   |             | N                 | GCSE       | AS       |     |               |       |      | 1                 | 2                | NG    | 400             |                     | 400                  | Y             |             |                                          |            | Improvement |                                               | LZP   | PHT  | TPM   |      |       |       |      | Y                |

|    |           |               |    |   |  |   |      |    |  |           |  |  |   |   |    |      |  |         |   |  |     |   |  |  |  |  |  |  |       |       |     |     |     |          |     |     |     |     |  |  |   |   |   |   |
|----|-----------|---------------|----|---|--|---|------|----|--|-----------|--|--|---|---|----|------|--|---------|---|--|-----|---|--|--|--|--|--|--|-------|-------|-----|-----|-----|----------|-----|-----|-----|-----|--|--|---|---|---|---|
| 24 | Kim       | Retrospective | 31 | M |  | N | GCSE | AS |  |           |  |  | 1 | 2 | NG | 500  |  | 500     | N |  |     |   |  |  |  |  |  |  | Death |       | LZP | VPA | TPM |          |     |     |     |     |  |  | Y |   |   |   |
| 25 | Kim       | Retrospective | 66 | F |  | N | GCSE | AS |  |           |  |  | 1 | 1 | NG | 800  |  | 800     | Y |  |     |   |  |  |  |  |  |  |       | Death |     | LZP | TPM |          |     |     |     |     |  |  |   | Y |   |   |
| 26 | Kim       | Retrospective | 36 | M |  | N | GCSE | AS |  |           |  |  | 1 | 1 | NG | 300  |  | 300     | Y |  |     |   |  |  |  |  |  |  |       | Death |     | LZP | TPM |          |     |     |     |     |  |  |   | Y |   |   |
| 27 | Kim       | Retrospective | 31 | F |  | N | GCSE | AS |  |           |  |  | 1 | 1 | NG | 1000 |  | 1000    | Y |  |     |   |  |  |  |  |  |  |       | Death |     | LZP | TPM |          |     |     |     |     |  |  |   | Y |   |   |
| 28 | Hottinger | Retrospective | 47 | F |  | N | GCSE | AS |  |           |  |  |   | 4 |    |      |  | 400-799 | Y |  |     |   |  |  |  |  |  |  |       |       |     | MDZ | PHT | PRO      | LEV | TPM |     |     |  |  |   |   | Y |   |
| 29 | Hottinger | Retrospective | 41 | f |  | Y | GCSE | AS |  |           |  |  |   | 5 |    |      |  | ≥800    | Y |  |     |   |  |  |  |  |  |  |       |       |     | LZP | VPA | PRO      | LEV | MDZ | TPM |     |  |  |   |   | Y |   |
| 30 | Hottinger | Retrospective | 23 | F |  | N | GCSE | AS |  |           |  |  |   | 5 |    |      |  | ≥800    | N |  |     |   |  |  |  |  |  |  |       |       |     | CLB | LEV | VPA      | MDZ | PRO | TPM | PHT |  |  |   | y |   |   |
| 31 | Stojanova | Retrospective | 16 | F |  | N | GCSE | RS |  | Stuporous |  |  |   | 4 |    |      |  | 200     | Y |  | 72h | Y |  |  |  |  |  |  | Death |       | LZP | CLB | PHT | TPT      | TPM |     |     |     |  |  |   | Y |   |   |
| 32 | Stojanova | Retrospective | 52 | M |  | Y | GCSE | RS |  | Somnolent |  |  |   | 3 |    |      |  | 450     | N |  |     |   |  |  |  |  |  |  |       |       |     | LEV | PHT | PRO      | TPM |     |     |     |  |  |   |   | Y |   |
| 33 | Stojanova | Retrospective | 20 | F |  | N | GCSE | AS |  | Stuporous |  |  |   | 5 |    |      |  | 600     | N |  |     |   |  |  |  |  |  |  |       |       |     | CLB | PT  | LEV      | VPA | PRO | TPM |     |  |  |   |   |   | Y |
| 34 | Stojanova | Retrospective | 25 | F |  | Y | GCSE | AS |  | Stuporous |  |  |   | 2 |    |      |  | 800     | N |  |     |   |  |  |  |  |  |  |       |       |     | CLB | PHT | TPM      |     |     |     |     |  |  |   |   | Y |   |
| 35 | Stojanova | Retrospective | 76 | F |  | N | GCSE | AS |  | Stuporous |  |  |   | 3 |    |      |  | 400     | N |  |     |   |  |  |  |  |  |  |       |       |     | LEV | LCM | steroids | TPM |     |     |     |  |  |   |   | Y |   |
