# Supplementary material for: Topiramate in the Treatment of Generalized Convulsive Status Epilepticus in Adults: A Systematic Review with Individual Patient Data Analysis
Source: Springer Nature journal article supplement (doi:10.1007/s40265-016-0672-2), 2016-12-21
Supplement: MOESM3 [file 24120916]

**Article title:** Topiramate in the treatment of generalized convulsive status epilepticus in adults: a systematic review with individual patient data analysis.

**Journal name:** Drugs.

**Authors:** Francesco Brigo, Nicola Luigi Bragazzi, Stanley C. Igwe, Raffaele Nardone, Eugen Trinkka

**Corresponding author:** Francesco Brigo, Department of Neuroscience, Biomedicine and Movement. University of Verona, Italy. Piazzale L.A. Scuro, 10 - 37134 Verona, Italy. Tel.: +390458124174; fax +390458124873 E-mail: dr.francescobrigo@gmail.com

## **Search strategies adopted in different databases**

### **MEDLINE:**

("topiramate"[All Fields] OR topiramate[Text Word]) AND ("status epilepticus"[MeSH Terms] OR status epilepticus[Text Word])

### **LILACS:**

topiramato AND "Estado epiléptico"

### **Google Scholar:**

topiramate AND "status epilepticus"[title]

### **Other databases:**

Topiramate AND "status epilepticus"
